# Supplementary material for: Effects of once-weekly subcutaneous retatrutide on weight and metabolic markers: A systematic review and meta-analysis of randomized controlled trials
Source: PubMed Central journal article supplement (PMC11420505; doi:10.1016/j.metop.2024.100321), 2024-09-13
Supplement: mmc2.pdf [file mmc2.pdf]

# Effects of Once-Weekly Subcutaneous Retatrutide on Weight and Metabolic Markers: A Systematic Review and Meta-analysis of Randomized Controlled Trials

Bibliography: Pasqualotto et al.

| Certainty assessment                      |              |                        |              |                      |                         |                               | Summary of findings   |                  |                                    |                              |                                                                     |
|-------------------------------------------|--------------|------------------------|--------------|----------------------|-------------------------|-------------------------------|-----------------------|------------------|------------------------------------|------------------------------|---------------------------------------------------------------------|
| Participants (studies)<br>Follow-up       | Risk of bias | Inconsistency          | Indirectness | Imprecision          | Publication bias        | Overall certainty of evidence | Study event rates (%) |                  | Relative effect (95% CI)           | Anticipated absolute effects |                                                                     |
|                                           |              |                        |              |                      |                         |                               | With placebo          | With Retatrutide |                                    | Risk with placebo            | Risk difference with Retatrutide                                    |
| <b>Body weight (kg)</b>                   |              |                        |              |                      |                         |                               |                       |                  |                                    |                              |                                                                     |
| 625<br>(3 RCTs)                           | not serious  | serious <sup>a,b</sup> | not serious  | serious <sup>c</sup> | none                    | ⊕⊕○○<br>Low                   | 130                   | 495              | -                                  |                              | MD <b>10.66 kg lower</b><br>(17.63 lower to 3.69 lower)             |
| <b>Body mass index (kg/m<sup>2</sup>)</b> |              |                        |              |                      |                         |                               |                       |                  |                                    |                              |                                                                     |
| 567<br>(2 RCTs)                           | not serious  | serious <sup>a,b</sup> | not serious  | serious <sup>d</sup> | none                    | ⊕⊕○○<br>Low                   | 115                   | 452              | -                                  |                              | MD <b>4.53 kg/m<sup>2</sup> lower</b><br>(7.51 lower to 1.55 lower) |
| <b>Weight reduction of ≥5%</b>            |              |                        |              |                      |                         |                               |                       |                  |                                    |                              |                                                                     |
| 567<br>(2 RCTs)                           | not serious  | serious <sup>a</sup>   | not serious  | serious <sup>d</sup> | strong association      | ⊕⊕⊕○<br>Moderate              | 32/115 (27.8%)        | 369/452 (81.6%)  | <b>RR 2.92</b><br>(2.17 to 3.93)   | 278 per 1.000                | <b>534 more per 1.000</b><br>(from 326 more to 815 more)            |
| <b>Weight reduction of ≥10%</b>           |              |                        |              |                      |                         |                               |                       |                  |                                    |                              |                                                                     |
| 567<br>(2 RCTs)                           | not serious  | serious <sup>a</sup>   | not serious  | serious <sup>d</sup> | very strong association | ⊕⊕⊕⊕<br>High                  | 7/115 (6.1%)          | 272/452 (60.2%)  | <b>RR 9.32</b><br>(4.56 to 19.06)  | 61 per 1.000                 | <b>506 more per 1.000</b><br>(from 217 more to 1.000 more)          |
| <b>Weight reduction of ≥15%</b>           |              |                        |              |                      |                         |                               |                       |                  |                                    |                              |                                                                     |
| 567<br>(2 RCTs)                           | not serious  | serious <sup>a</sup>   | not serious  | serious <sup>d</sup> | very strong association | ⊕⊕⊕⊕<br>High                  | 3/115 (2.6%)          | 217/452 (48.0%)  | <b>RR 18.40</b><br>(6.00 to 56.42) | 26 per 1.000                 | <b>454 more per 1.000</b><br>(from 130 more to 1.000 more)          |
| <b>Weight reduction of ≥20%</b>           |              |                        |              |                      |                         |                               |                       |                  |                                    |                              |                                                                     |
| 567<br>(2 RCTs)                           | not serious  | serious <sup>a</sup>   | not serious  | serious <sup>d</sup> | very strong association | ⊕⊕⊕⊕<br>High                  | 2/115 (1.7%)          | 146/452 (32.3%)  | <b>RR 16.61</b><br>(4.17 to 66.12) | 17 per 1.000                 | <b>271 more per 1.000</b><br>(from 55 more to 1.000 more)           |
| <b>HbA1c (%)</b>                          |              |                        |              |                      |                         |                               |                       |                  |                                    |                              |                                                                     |
| 625<br>(3 RCTs)                           | not serious  | serious <sup>a,b</sup> | not serious  | serious <sup>c</sup> | none                    | ⊕⊕○○<br>Low                   | 130                   | 495              | -                                  |                              | MD <b>0.9 % lower</b><br>(1.63 lower to 0.17 lower)                 |

CI: confidence interval; MD: mean difference; RR: risk ratio

## Explanations

- a. Heterogeneity between studies due to differences in baseline patient characteristics.
- b. High heterogeneity.
- c. Only 3 studies were included in the pooled analysis.

d. Only 2 studies were included in the pooled analysis.
